# Supplementary material
Source: PubMed Central journal article supplement (PMC1567673)

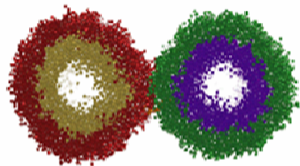

**Stalk (narrow pore)**

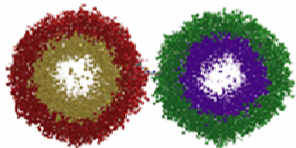

**Unfused**

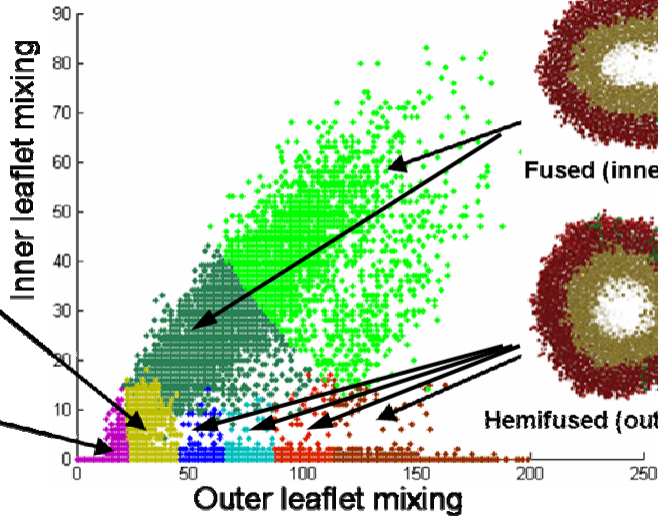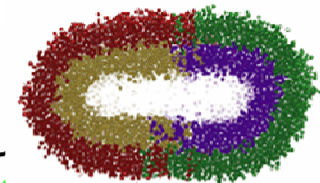

**Fused (inner leaflet mixing)**

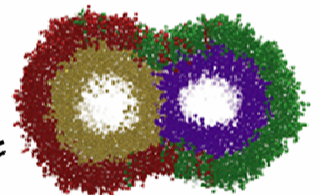

**Hemifused (outer leaflet mixing)**

Supplement: pnas_0601597103_1.pdf [file pnas_0601597103_1.pdf]

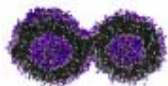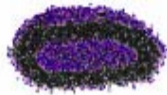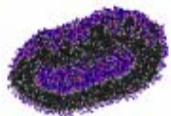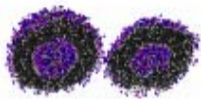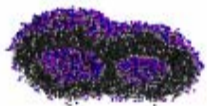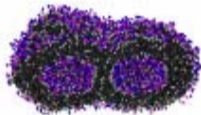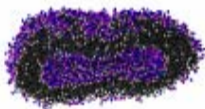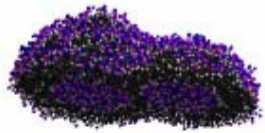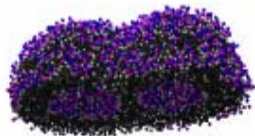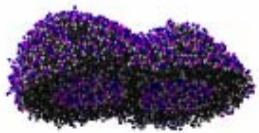

Supplement: pnas_0601597103_2.pdf [file pnas_0601597103_2.pdf]

a.

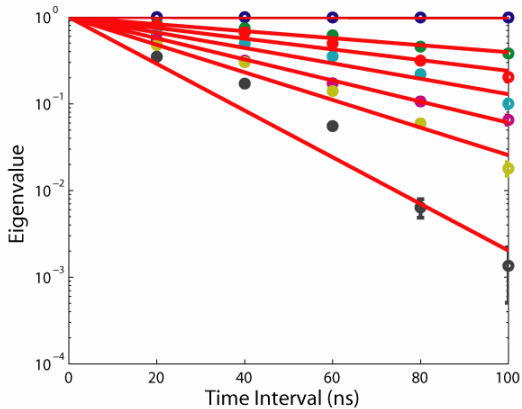

b.

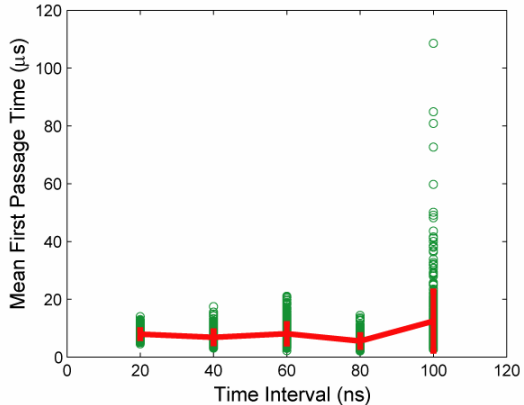

Supplement: pnas_0601597103_3.pdf [file pnas_0601597103_3.pdf]

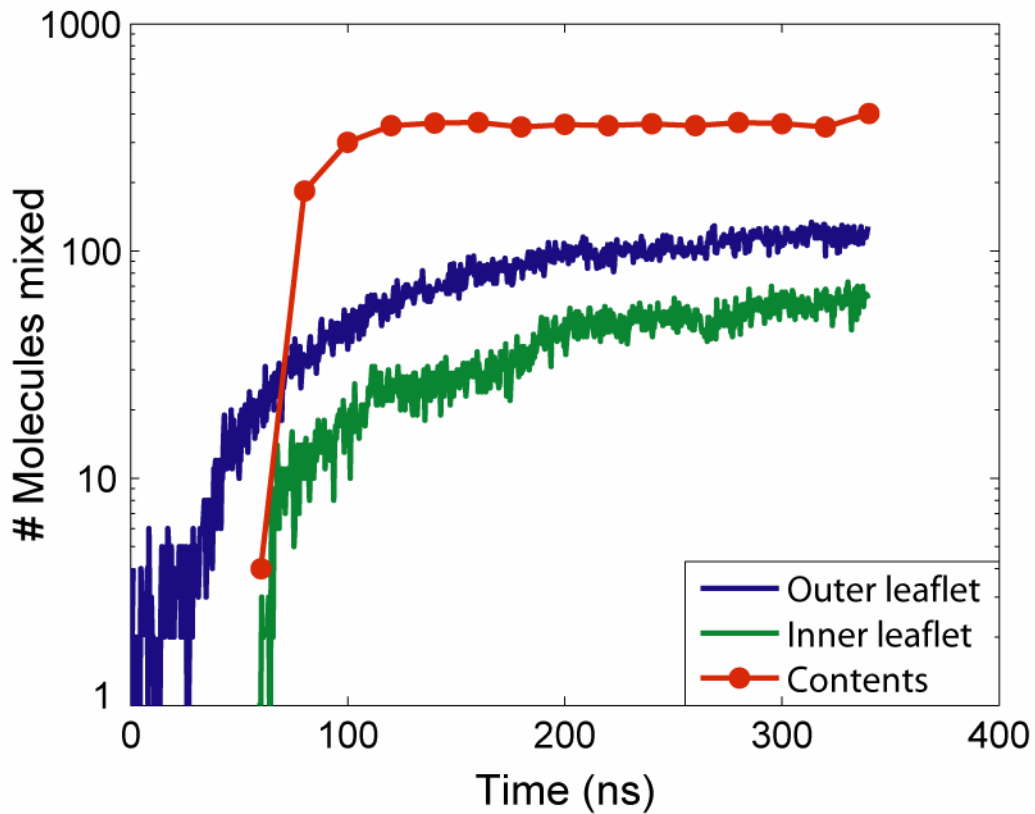

Supplement: pnas_0601597103_4.pdf [file pnas_0601597103_4.pdf]

a.

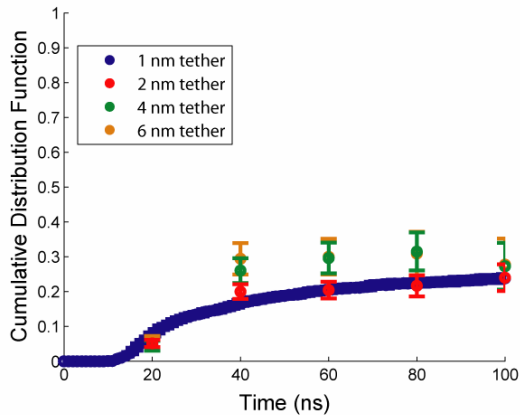

b.

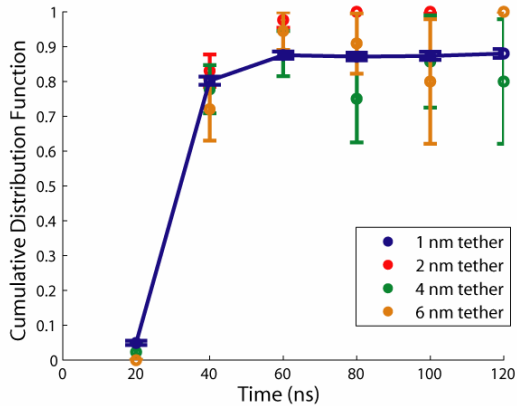

Supplement: pnas_0601597103_5.pdf [file pnas_0601597103_5.pdf]

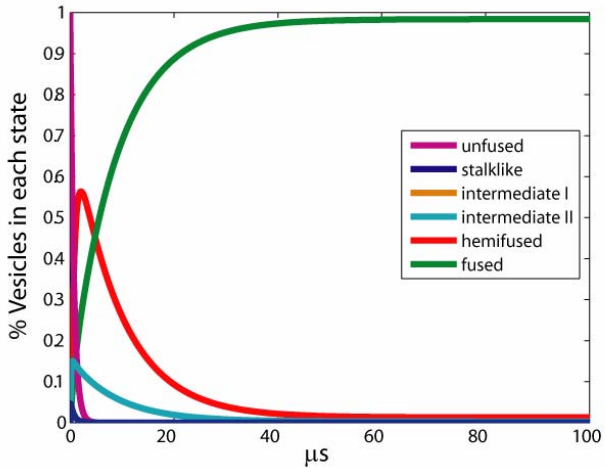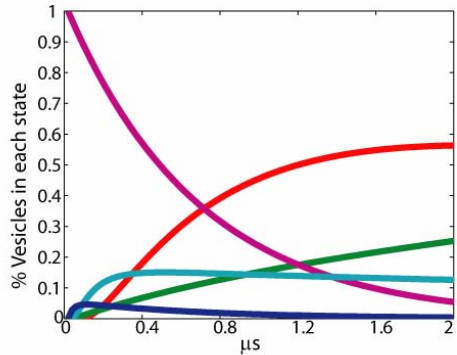

Supplement: pnas_0601597103_6.pdf [file pnas_0601597103_6.pdf]

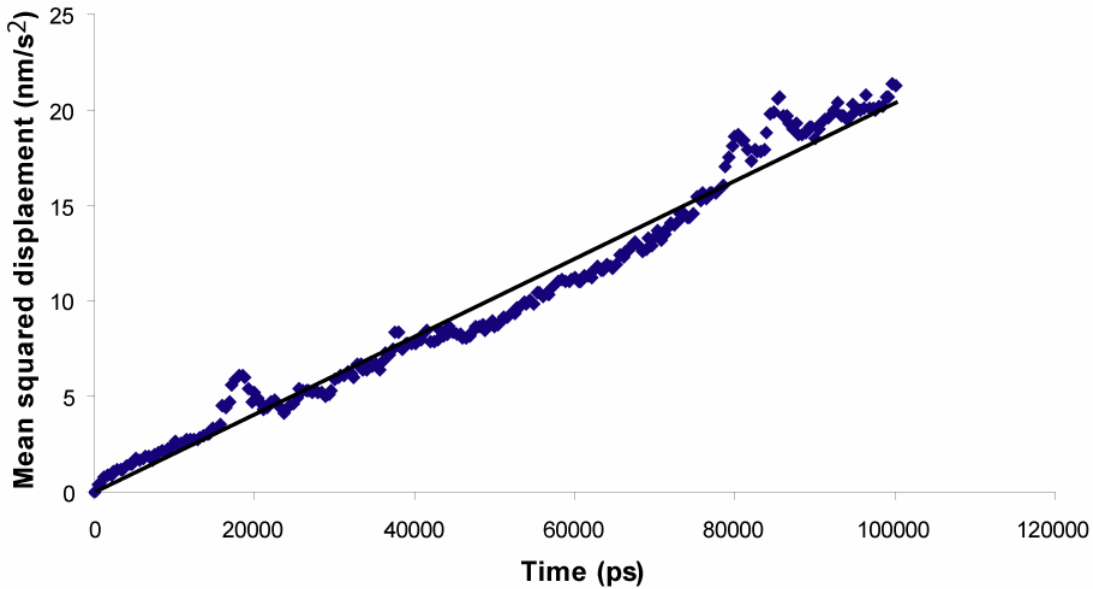

Supplement: pnas_0601597103_7.pdf [file pnas_0601597103_7.pdf]

a.

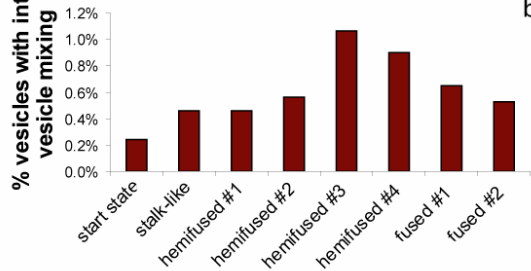

b.

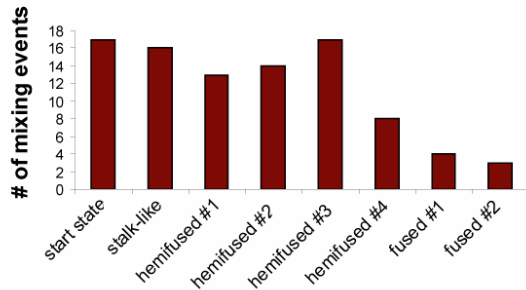

c.

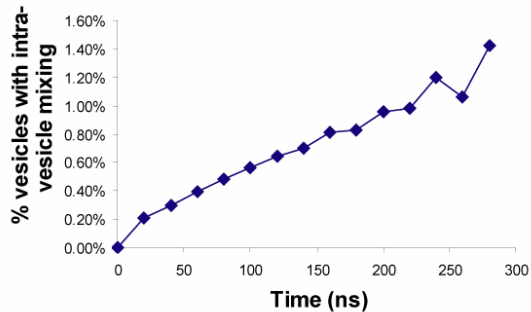

Supplement: pnas_0601597103_8.pdf [file pnas_0601597103_8.pdf]
